# Supplementary material
Source: PubMed Central journal article supplement (PMC7308074)
Supplement: NIHMS1067226-supplement-Supplementary_Table_1.pdf [file NIHMS1067226-supplement-Supplementary_Table_1.pdf]

Supplementary Table 1. Antibodies used in immunoblots.

| <b>Antibody</b>  | <b>Company</b>            | <b>Catalog number</b> |
|------------------|---------------------------|-----------------------|
| HA-Tag           | Cell Signaling Technology | 2367                  |
| pEGFR (Y1068)    | Cell Signaling Technology | 3777                  |
| EGFR             | Cell Signaling Technology | 4267                  |
| pSHP2 (Y542)     | Abcam                     | ab62322               |
| SHP2             | Santa Cruz Biotechnology  | sc-7384               |
| KRAS             | Millipore Sigma           | WH0003845M1           |
| pCRAF (S338)     | Millipore Sigma           | 05-538                |
| CRAF             | Cell Signaling Technology | 9422                  |
| pERK (T202/Y204) | Cell Signaling Technology | 9101                  |
| ERK              | Cell Signaling Technology | 4696                  |
| pRSK (T359)      | Cell Signaling Technology | 8753                  |
| RSK              | Cell Signaling Technology | 9355                  |
| p21              | Cell Signaling Technology | 2947                  |
| p27              | Cell Signaling Technology | 2552                  |
| CCND1            | Santa Cruz Biotechnology  | sc-718                |
| pAURKA (T288)    | Cell Signaling Technology | 2914                  |
| AURKA            | Cell Signaling Technology | 14475                 |
| PLK1             | Cell Signaling Technology | 4513                  |
| CCNB1            | Santa Cruz Biotechnology  | sc-245                |
| Cleaved PARP     | Cell Signaling Technology | 5625                  |
| GAPDH            | Santa Cruz Biotechnology  | sc-32233              |
| $\beta$ -actin   | Cell Signaling Technology | 4970                  |
